*Original Article***Adverse effects of chronic low level lead exposure on kidney function—  
a risk group study in children**

Lüder M. Fels<sup>1</sup>, Markus Wünsch<sup>1</sup>, Jacek Baranowski<sup>2</sup>, Irena Norska-Borówka<sup>2</sup>, Robert G. Price<sup>3</sup>, Sarah A. Taylor<sup>3</sup>, Sharmila Patel<sup>3</sup>, Marc De Broe<sup>4</sup>, Monique M. Elsevier<sup>4</sup>, Robert Lauwerys<sup>5</sup>, Harry Roels<sup>5</sup>, Alfred Bernard<sup>5</sup>, Antonio Mutti<sup>6</sup>, Emilio Gelpi<sup>7</sup>, Joan Roselló<sup>7</sup> and Hilmar Stolte<sup>1</sup>

<sup>1</sup>Division of Nephrology, Medical School Hannover, Germany, <sup>2</sup>Silesian Medical Academy, Zabrze, Poland, <sup>3</sup>Division of Biomolecular Sciences, Biochemistry Section, King's College London, UK, <sup>4</sup>Department of Nephrology–Hypertension, University of Antwerp, Edegem-Antwerp and <sup>5</sup>Unité de Toxicologie Industrielle et Médecine du Travail, Université Catholique de Louvain, Brussels, Belgium, <sup>6</sup>Laboratory of Industrial Toxicology, University of Parma Medical School, Parma, Italy and <sup>7</sup>Department of Biomedical Analysis, Unit of Molecular Pathology and Biochemistry of Inflammation, CSIC, Barcelona, Spain

**Abstract**

**Background.** Children have been considered a risk group for lead (Pb) toxicity, mainly because of neuro-physiological or neuro-cognitive deficits following Pb exposure. Blood Pb levels (b-Pb) of 100 µg/l currently have been defined as the lowest adverse effect level. The aim of this study was to compare, with the help of urinary markers, the kidney function of children with b-Pb just above this threshold with that of unexposed children, to assess from a nephrological point of view whether the current threshold is justified and whether children really are a particularly vulnerable risk group in terms of Pb-induced kidney damage.

**Methods.** In a cross-sectional study, 112 children, either from unexposed areas (controls,  $n=50$ ) or Pb-contaminated areas ( $n=62$ ), the latter partly with a known history of elevated b-Pb, were examined. Twenty nine urinary or serum markers mostly related to the function or integrity of specific nephron segments were determined (e.g. filtered plasma proteins, tubular enzymes, tubular antigens, eicosanoids).

**Results.** b-Pb were  $39 \pm 13$  µg/l in controls and  $133 \pm 62$  µg/l in exposed children. The main findings were increased excretion rates of prostaglandins and thromboxane B<sub>2</sub>, epidermal growth factor,  $\beta_2$ -microglobulin and Clara cell protein in the exposed children. A relationship between b-Pb and the prevalence of values above the upper reference limits was observed.

**Conclusions.** With the help of urinary markers, nephron segment-specific effects of chronic low-level Pb exposure could be detected in children. The pattern of effects on glomerular, proximal and distal tubular and interstitial markers was similar to that previously observed in adults. The changes, however, occur at

lower b-Pb levels than in adults. The current threshold appears to be justified also from a nephrological point of view, and children can indeed be considered a special risk group.

**Key words:** children; Clara cell protein; EGF; eicosanoids; glomerular and tubular function; lead exposure

**Introduction**

Exposure to lead (Pb) can cause considerable toxic effects [1–5]. The blood lead level (b-Pb) is considered a valuable marker of Pb exposure. A variety of factors, such as the use of unleaded petrol, unleaded paint or the restricted use of Pb for water pipes, have led to a reduced exposure of large parts of the population over the last decades. Large surveys showed that the mean b-Pb of, for instance, the German adult population dropped from close to 65 µg/l in the 1980s to 45 µg/l in 1990/92 [6]. On average, children have lower b-Pb than adults. Children of 6–14 years of age screened had a mean b-Pb of 33 µg/l [6]. The trend towards lower Pb exposure means that in terms of effects of Pb, the focus should shift from toxic effects of high level Pb exposure, such as anaemia or encephalopathies, to toxic effects of low level Pb exposure.

Children have been considered a special risk group for Pb exposure; they absorb Pb more readily than adults. Neuro-physiological and neuro-cognitive deficits have been associated with a b-Pb as low as 100–150 µg/l [7–9] and alterations of the haematopoietic system with a b-Pb of 150–300 µg Pb/l [10,11]. However, studies also indicate renal involvement in children: the excretion of retinol-binding protein (RBP) was significantly altered in children with a b-Pb > 123 µg/l [12]. Thresholds for interventions were

Correspondence and offprint requests to: Lüder M. Fels, PhD, Medical School Hannover, Division of Nephrology, Carl-Neuberg-Str. 1, D-30625 Hannover, Germany.

defined by different agencies. For children, the CDC (Centers for Disease Control and Prevention, Atlanta, USA) or the German Umweltbundesamt (Federal Environmental Agency) currently recommend b-Pb 100 µg/l as a level of concern [9,13].

In adults, urinary markers related to the function or integrity of different nephron segments have been proven to be useful for detecting effects of Pb. An altered excretion of markers such as  $\alpha_1$ -microglobulin, *N*-acetyl- $\beta$ -D-glucosaminidase, tubular brush border antigens, fibronectin, thromboxane B<sub>2</sub> and 6-keto-prostaglandin<sub>1 $\alpha$</sub>  has been observed [3–5].

The aims of the present study were: (i) to apply a set of mainly urinary markers with a certain specificity for the function or integrity of the nephron segments to describe the effects of chronic low level Pb in children; (ii) to assess for children whether the postulated threshold of 100 µg Pb/l blood appears to be justified on a nephrological basis that takes into account the state of the art of urine analysis; and (iii) to assess whether children are a particularly vulnerable risk group in terms of Pb-induced effects on the kidney.

## Subjects and methods

### Study population

Subjects examined were children from three schools in the area of Katowice, Poland. Children living in the vicinity of lead-producing factories ( $n=62$ ) were considered exposed. Up to 39 of these children had been screened at least once for Pb in blood during a 3 year period prior to the study reported here. Children from the same province but without Pb emission in their neighbourhood ( $n=50$ ) were considered controls. Table 1 summarizes the group characteristics.

### Collection of samples

Spot urines (second of the morning) were collected between 8 and 11 a.m. in polypropylene containers (Sarstedt, Nümbrecht, Germany). The material for blood sampling was certified for trace metal determination (LH-Metallanalytik, Monovetten®, Sarstedt, Nümbrecht, Germany). Aliquots of the urine samples, either native urine, supplemented with preserving solutions, or following gel filtration (Columns PD10, Sephadex® G25M, Pharmacia, Sweden), were frozen at  $-20^\circ\text{C}$ .

**Table 1.** Characteristics of groups examined

| Variable <sup>a</sup>        | Controls       | Exposed        |
|------------------------------|----------------|----------------|
| Number                       | 50             | 62             |
| Boys/girls <sup>b</sup>      | 28/22          | 44/18          |
| Age (years) <sup>c</sup>     | 9.9 $\pm$ 0.4  | 10.6 $\pm$ 1.2 |
| Height (cm) <sup>c</sup>     | 141 $\pm$ 8    | 140 $\pm$ 10   |
| Weight (kg) <sup>c</sup>     | 34.8 $\pm$ 7.2 | 34.6 $\pm$ 8.2 |
| Body mass index <sup>c</sup> | 17.5 $\pm$ 2.7 | 17.4 $\pm$ 2.5 |

Number, mean  $\pm$  SD; <sup>a</sup>no significant differences between the groups examined concerning the variables listed; <sup>b</sup> $\chi^2$  test; <sup>c</sup>*t*-test.

Aliquots for the determination of total protein, the fraction of high molecular weight proteins (HMW, molecular weight greater albumin), the fraction of low molecular weight proteins (LMW, molecular weight less than that of albumin), albumin, transferrin, RBP Clara cell protein,  $\alpha_1$ -microglobulin,  $\beta_2$ -microglobulin and the brush border antigens CB7, CG9 and HF5 were supplemented with 0.1 ml of 1 M phosphate buffer, pH 7.6, with 0.2% NaN<sub>3</sub> per ml of urine. For the analysis of the eicosanoids 6-keto-prostaglandin F<sub>1 $\alpha$</sub>  (6-keto-PGF<sub>1 $\alpha$</sub> ), thromboxane B<sub>2</sub> (TXB<sub>2</sub>) and prostaglandin E<sub>2</sub> (PGE<sub>2</sub>) as well as leukotriene E<sub>4</sub> (LTE<sub>4</sub>) 1 µl of lysine acetylsalicylate (1% in H<sub>2</sub>O) was added per ml of urine. Fibronectin was quantified in samples containing the protease inhibitor Pefabloc® [4-(2-aminoethyl)-benzolsulfonylfluoride hydrochloride, Merck, Darmstadt, Germany] in a final concentration of 1 mM. Aliquots for the determination of  $\alpha$ -glutathione-S-transferase ( $\alpha$ GST) and  $\pi$ -glutathione-S-transferase ( $\pi$ GST) were supplemented with a buffer supplied by the manufacturer of the commercial test kits (Biotrin Nephkit  $\alpha$  EIA and Biotrin Nephkit  $\pi$  EIA, Biotrin, Ireland). Analyses of intestinal alkaline phosphatase (IAP) and epidermal growth factor (EGF) were performed in urine aliquots containing per ml of urine 50 µl of 1 M imidazole buffer (pH 7.0), with 2% Triton X-100, 20 mM benzamidine, 2000 U/ml aprotinin, 1% NaN<sub>3</sub>.  $\gamma$ -Glutamyltransferase ( $\gamma$ GT), alanine aminopeptidase (AAP), *N*-acetyl- $\beta$ -D-glucosaminidase (NAG<sub>total</sub>), isoform B of NAG (NAG B), laminin,  $\delta$ -aminolaevulinic acid and creatinine (Cr) were determined in untreated urines.

### Analytical methods

Samples from both cohorts under study were examined within the same runs of the analysis. Total protein in the urine samples was determined by the Coomassie blue binding method [14]. Albumin, HMW and LMW were quantified by densitometry of bands stained with Coomassie blue following protein separation on a gradient SDS-PAGE [15]. Software packages used were Gel-Image1.3® and Gel-Scan XL2.0® (Pharmacia, Uppsala, Sweden). Transferrin,  $\beta_2$ -microglobulin, RBP and Clara cell protein were quantified with a latex immunoassay [16]. Immunoassays were applied for HF5, CB7 and CG9, IAP, EGF, fibronectin and laminin [17–21]. For the determination of eicosanoids and LTE<sub>4</sub>, a radioimmunoassay was applied to samples extracted with Sep-Pak C18 cartridges and high performance liquid chromatography [22]. The methods for determination of NAG<sub>total</sub>, NAG B,  $\gamma$ GT and AAP have been published elsewhere [23–26].  $\alpha$ GST,  $\pi$ GST and  $\alpha_1$ -microglobulin were determined with commercially available test kits (Biotrin Nephkit  $\alpha$  EIA and  $\pi$  EIA, Biotrin, Ireland; synelisa,  $\alpha_1$ -microglobulin, Pharmacia, Freiburg, Germany). Creatinine in urine and serum was quantified with a modified Jaffé reaction (Beckman Creatinine Analyzer2, Beckman Instruments, Germany).

Pb and cadmium (Cd) in urine (u-Pb, u-Cd) and blood (b-Pb, b-Cd) was measured by electrothermal graphite furnace atomic absorption spectrometry using a Perkin-Elmer Zeeman 3030 atomic absorption spectrometer. Standards (serum and urine) were supplied by Nycomed (Garching, Germany). The laboratory performing the heavy metal analysis (Centralnym Laboratorium Toksykologii Metali Ciekich, Miasteczko Slaskie, Poland) takes part in quality control programmes. Zinc protoporphyrin in erythrocytes was determined with a haematofluorimeter (ZPP Meter 210, AVIV Associates, Lakewood, NJ); values were related to g

of haemoglobin (Hb).  $\delta$ -Aminolaevulinic acid was quantified with standard methods [27].

### Calculations and statistics

Excretion of urinary analytes was related to urinary creatinine to compensate for the influence of urine flow rate on excretion rates. Statistical analysis was performed with SPSS 6.1.3 (Chicago, IL). Variables with a skewed distribution (Kolmogorov–Smirnov test) were compared with the Mann–Whitney U test. In the case of a normal distribution, the *t*-test was applied. The upper limit of normal was defined as the 95th percentile of the control group. Differences in the prevalence of values exceeding the upper limit of normal were compared with  $\chi^2$  statistics (Fisher's exact test). Correlation coefficients according to Pearson were calculated.  $P \leq 0.05$  (two-sided) was considered statistically significant.

## Results

### Biomarkers of exposure

Table 2 summarizes the results on the biomarkers of exposure. The exposed children had significantly higher b-Pb than the controls ( $133 \pm 62 \mu\text{g Pb/l}$  vs  $39 \pm 13 \mu\text{g Pb/l}$ ). Figure 1 depicts b-Pb levels of both groups as a cumulative frequency and shows that  $\sim 70\%$  of the exposed children had levels above the level of concern defined by the CDC or the Umweltbundesamt. Forty-one exposed children had been screened at least once during the period 1992–1994. Only one measurement for a single child had shown a blood level  $< 100 \mu\text{g Pb/l}$ . Mean b-Pb levels had remained stable during the whole period covered by the screenings (ANOVA,  $P > 0.05$ ). u-Pb was also elevated. u-Cd was slightly elevated when the excretion was related to g of creatinine. Indicators of

**Table 2.** Markers of exposure in blood and urine at the time of sampling (1995) and blood lead levels of exposed children from 1992 to 1994

| Marker of exposure                                     | Controls<br>( <i>n</i> = 50) | Exposed<br>( <i>n</i> = 62)                |
|--------------------------------------------------------|------------------------------|--------------------------------------------|
| <b>Blood</b>                                           |                              |                                            |
| b-Pb ( $\mu\text{g/l}$ ) 1995                          | $39 \pm 13$                  | $133 \pm 62^{***}$                         |
| 1994                                                   |                              | $174 \pm 54$ ( <i>n</i> = 39) <sup>a</sup> |
| 1994                                                   |                              | $208 \pm 89$ ( <i>n</i> = 10)              |
| 1993                                                   |                              | $210 \pm 43$ ( <i>n</i> = 21)              |
| 1992                                                   |                              | $182 \pm 26$ ( <i>n</i> = 21)              |
| b-Cd ( $\mu\text{g/l}$ )                               | $0.55 \pm 0.18$              | $0.69 \pm 0.23^{***}$                      |
| Zinc protoporphyrin<br>( $\mu\text{g/g Hb}$ )          | $1.7 \pm 0.5$                | $2.0 \pm 1.2$                              |
| <b>Urine</b>                                           |                              |                                            |
| u-Pb ( $\mu\text{g/l}$ )                               | $7.0 \pm 3.7$                | $16.4 \pm 15.7^{***}$                      |
| u-Pb ( $\mu\text{g/g Cr}$ )                            | $7.7 \pm 3.8$                | $27.6 \pm 25.6^{***}$                      |
| u-Cd ( $\mu\text{g/l}$ )                               | $0.40 \pm 0.24$              | $0.49 \pm 0.35$                            |
| u-Cd ( $\mu\text{g/g Cr}$ )                            | $0.43 \pm 0.24$              | $0.88 \pm 0.72^{***}$                      |
| $\delta$ -Aminolaevulinic acid<br>( $\text{mg/g Cr}$ ) | $3.2 \pm 1.3$                | $3.7 \pm 1.8$                              |

\*\*\* $P < 0.001$  vs controls, *t*-test; <sup>a</sup>number of children of the exposed group screened in previous years.

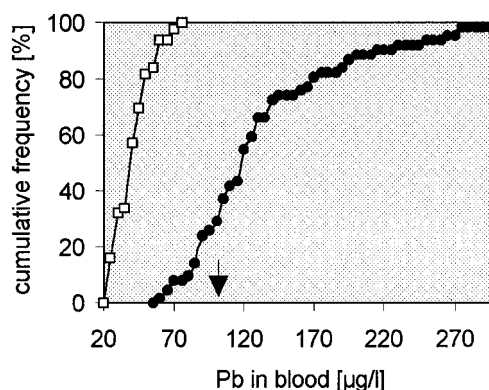

**Fig. 1.** Cumulative frequency of b-Pb at the time of urine sampling in the exposed (●, *n* = 62) and control cohort (□, *n* = 50). The arrow indicates the threshold proposed as lowest adverse effect level ( $100 \mu\text{g Pb/l}$ ) by different health organizations.

haemoglobin metabolism (zinc protoporphyrin,  $\delta$ -aminolaevulinic acid) did not differ between the two groups studied.

### Parameters of kidney function determined in serum and general markers of effect in urine

Table 3 shows the parameters determined in serum. Only  $\beta_2$ -microglobulin was elevated in the exposed children. The prevalence of increased results (95th percentile of controls =  $3.05 \text{ mg/l}$ ) was also slightly elevated (16 vs 4% among the controls,  $\chi^2$  test,  $P < 0.05$ ). The parameters of effect determined in urine (total protein, albumin, laminin,  $\text{LTE}_4$ ) that were not related to a specific nephron segment did not show any differences between the two cohorts (Table 4).

### Nephron segment-specific biomarkers

The following markers have a relative—though partly not exclusive—specificity for certain anatomical structures of the nephron and have therefore been called nephron segment specific.

**Indicators of glomerular function.** 6-Keto-PGF<sub>1 $\alpha$</sub>  and TXB<sub>2</sub> were significantly elevated (Table 4, Figure 2a and b). Both parameters correlated with b-Pb ( $r = 0.441$ ,  $P < 0.01$  and  $r = 0.225$ ,  $P < 0.025$ , respectively). The prevalence of increased results of 6-keto-PGF<sub>1 $\alpha$</sub>  exceeding the upper reference limit of the controls was significantly elevated (24.2%,  $P < 0.01$ ).

When the total exposed population was stratified into three groups according to their b-Pb [ $< 100 \mu\text{g Pb/l}$

**Table 3.** Indicators of kidney function determined in serum

| Parameter                              | Controls<br>( <i>n</i> = 50) | Exposed<br>( <i>n</i> = 62) |
|----------------------------------------|------------------------------|-----------------------------|
| Creatinine (mg/dl)                     | $0.63 \pm 0.10$              | $0.63 \pm 0.09$             |
| $\beta_2$ -Microglobulin (mg/l)        | $1.66 \pm 0.80$              | $2.18 \pm 0.89^{**}$        |
| Clara cell protein ( $\mu\text{g/l}$ ) | 11 (2–107)                   | 11 (5–23)                   |

\*\* $P < 0.01$ , *t*-test.

**Table 4.** Median values (minimum–maximum) of urinary biomarkers

| Biomarker                                                                  | Controls ( <i>n</i> = 50)    | Exposed ( <i>n</i> = 62)     | <i>P</i> -value <sup>a</sup> |
|----------------------------------------------------------------------------|------------------------------|------------------------------|------------------------------|
| <b>Glomerular markers</b>                                                  |                              |                              |                              |
| HMW (mg/g Cr)                                                              | 7 (0–32)                     | 6 (0–52)                     | n.s.                         |
| Transferrin (mg/g Cr)                                                      | 0.41 (0.07–17.3)             | 0.83 (0.11–24.3)             | <0.05                        |
| Fibronectin (μg/g Cr)                                                      | 220 (0–1243)                 | 189 (45–2316)                | n.s.                         |
| 6-keto-PGF <sub>1α</sub> (ng/g Cr)                                         | 485 (138–1286)               | 745 (400–3934)               | <0.01                        |
| TXB <sub>2</sub> (ng/g Cr)                                                 | 360 (6–847)                  | 471 (120–1307)               | <0.01                        |
| <b>Proximal tubular markers</b>                                            |                              |                              |                              |
| <b>Enzymes</b>                                                             |                              |                              |                              |
| αGST (μg/g Cr)                                                             | 6.2 (0.2–58.8) <sup>b</sup>  | 7.4 (0.5–63.1)               | n.s.                         |
| AAP (U/g Cr)                                                               | 11 (5–23)                    | 11 (0–25)                    | n.s.                         |
| γGT (U/g Cr)                                                               | 47 (16–102)                  | 47 (21–100)                  | n.s.                         |
| NAG <sub>total</sub> (U/g Cr)                                              | 2.1 (0.9–4.8)                | 1.9 (0.6–8.1)                | n.s.                         |
| NAG B (U/g Cr)                                                             | 0.18 (0.03–0.60)             | 0.13 (0–0.49)                | <0.01                        |
| IAP (U/g Cr)                                                               | 0.76 (0.07–2.4) <sup>b</sup> | 0.81 (0.13–2.6) <sup>c</sup> | n.s.                         |
| <b>Serum-derived proteins</b>                                              |                              |                              |                              |
| α <sub>1</sub> -Microglobulin (mg/g Cr)                                    | 1.1 (0.3–3.1)                | 1.4 (0.05–17.7)              | n.s.                         |
| β <sub>2</sub> -Microglobulin (μg/g Cr)                                    | 37 (4–764) <sup>b</sup>      | 89 (5–1145)                  | <0.025                       |
| RBP (μg/g Cr)                                                              | 42 (11–207)                  | 46 (7–183)                   | n.s.                         |
| Clara cell protein (μg/g Cr)                                               | 2.8 (1–24.3) <sup>b</sup>    | 4.2 (1.2–30.2)               | <0.025                       |
| LMW (mg/g Cr)                                                              | 2 (0–21)                     | 2 (0–64)                     | n.s.                         |
| <b>Tubular antigens</b>                                                    |                              |                              |                              |
| CB7 (U/g Cr)                                                               | 35 (1–128)                   | 37 (1–148)                   | n.s.                         |
| CG9 (U/g Cr)                                                               | 24 (1–115)                   | 19 (1–151)                   | n.s.                         |
| HF5 (U/g Cr)                                                               | 32 (1–121)                   | 28 (1–128)                   | n.s.                         |
| <b>Distal tubular markers</b>                                              |                              |                              |                              |
| πGST (μg/g Cr)                                                             | 9.1 (0–151.7)                | 5.1 (0–534.4)                | n.s.                         |
| EGF (μg/g Cr)                                                              | 29 (10–59) <sup>b</sup>      | 57 (5–160)                   | <0.001                       |
| <b>Collecting duct, interstitial cells</b>                                 |                              |                              |                              |
| PGE <sub>2</sub> (ng/g Cr)                                                 | 242 (10–937)                 | 366 (120–1553)               | <0.01                        |
| <b>General markers; not primarily related to specific nephron segments</b> |                              |                              |                              |
| Total protein (mg/g Cr)                                                    | 34 (0–127)                   | 34 (0–212)                   | n.s.                         |
| Albumin (mg/g Cr)                                                          | 6 (0.1–35)                   | 7 (0.3–47)                   | n.s.                         |
| Laminin (μg/g Cr)                                                          | 0.11 (0–1.09)                | 0.10 (0–3.08)                | n.s.                         |
| LTE <sub>4</sub> (ng/g Cr)                                                 | 317 (14–2627)                | 366 (34–4210)                | n.s.                         |

<sup>a</sup>Mann–Whitney U test; n.s., not significant; <sup>b</sup>*n* = 49; <sup>c</sup>*n* = 61.

(*n* = 19), 100–200 μg Pb/l (*n* = 36) and >200 μg Pb/l (*n* = 7)], an increasing prevalence of abnormal values of 6-keto-PGF<sub>1α</sub> was observed in the group with higher b-Pb. A corresponding dose-dependent increase could not be observed for TXB<sub>2</sub> (Figure 3).

Transferrin was excreted in higher amounts by the exposed children (Table 4, Figure 4), but no increased prevalence of abnormal values could be observed. There was a weak, though significant correlation with zinc protoporphyrin (*r* = 0.26; *P* < 0.01). Neither HMW nor fibronectin as glomerular marker appeared to be affected.

**Indicators of proximal tubular function.** None of the proximal tubular urinary enzymes determined (NAG<sub>total</sub>, NAG B, αGST, AAP, γGT, IAP) apart from NAG B showed any differences between the two groups studied. NAG B was excreted in lower amounts in the exposed children; no correlation with the parameters of exposure could be observed. CB7, CG9 and HF5 showed no differences among the two groups studied. β<sub>2</sub>-Microglobulin and Clara cell protein were elevated in urine from exposed children (Table 4, Figure 5a and b), and both parameters correlated with b-Pb (β<sub>2</sub>-microglobulin *r* = 0.203, *P* < 0.05; Clara cell protein *r* = 0.261, *P* < 0.01). The prevalences of values

exceeding the upper reference limits of controls were elevated for α<sub>1</sub>-microglobulin (22.6%, *P* < 0.01) and Clara cell protein (21%, *P* < 0.01). The other serum-derived low molecular weight proteins were not affected. β<sub>2</sub>-Microglobulin is unstable in acid urine [28]. Urinary pH, prior to addition of buffer, was 5.3 ± 0.7 in the controls and 5.4 ± 0.8 in the exposed children. Gender-dependent differences in the excretion of Clara cell protein have been described [29]. There was a higher, though statistically not significant, percentage of boys among the exposed children. However, no influence of gender could be shown with ANOVA and regression procedures.

**Indicators of distal tubular function.** Excretion of the enzyme πGST was not affected. EGF excretion was significantly (*P* < 0.001) elevated in exposed children (Table 4, Figure 6). EGF correlated with b-Pb (*r* = 0.356, *P* < 0.01), and 59% of the exposed children exceeded the 95th percentile of the controls for EGF (*P* < 0.001). A high prevalence of values exceeding the 95th percentile of the controls was found in children with b-Pb from 100 to 200 or >200 μg/l, 72 and 43% respectively (Figure 7).

**Indicators of the collecting duct and interstitial cells.** PGE<sub>2</sub> as a parameter for the interstitial cells was

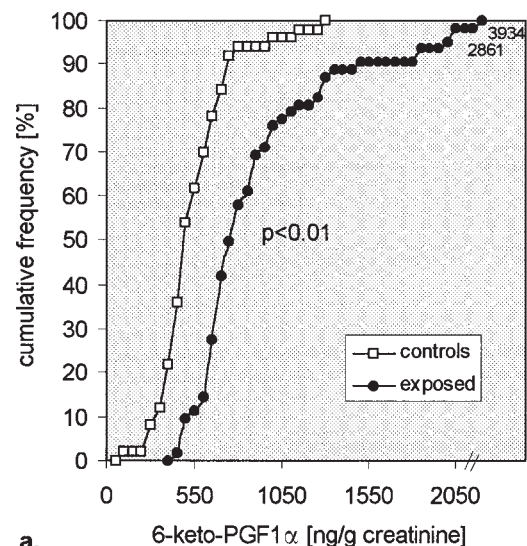

a.

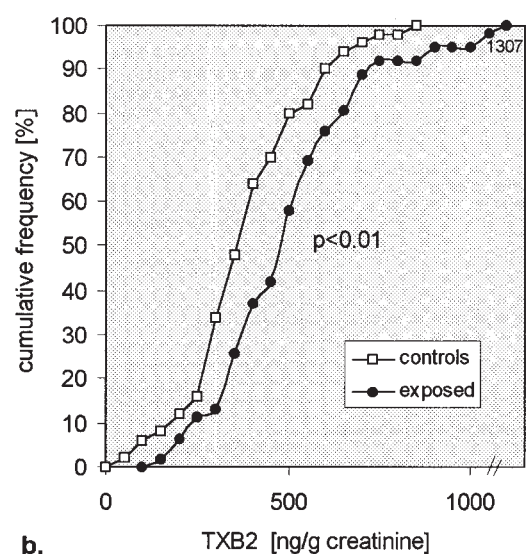

b.

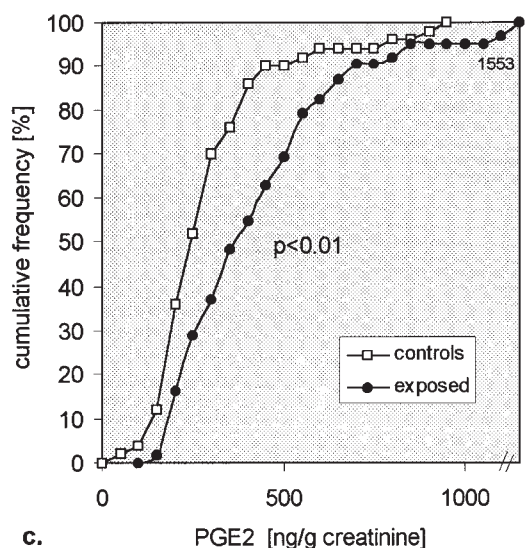

c.

% of values exceeding 95th percentile of controls

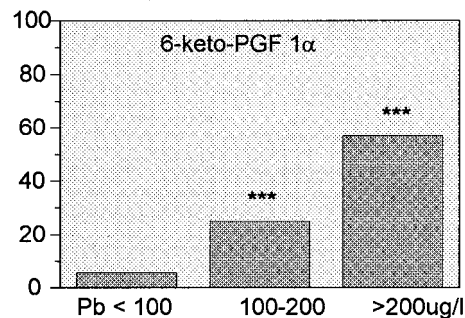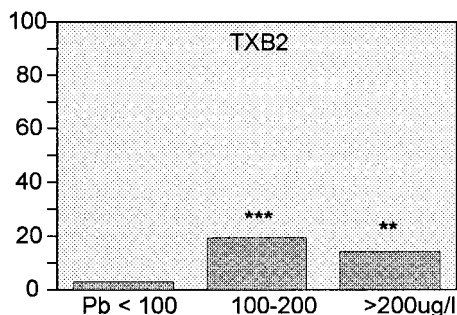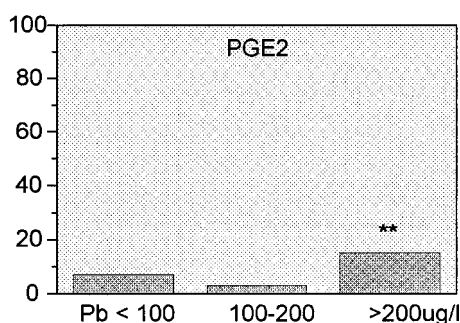

**Fig. 3.** Prevalence of values exceeding the upper limit of normal of eicosanoids (95th percentiles of the controls: 6-keto-PGF<sub>1α</sub> 999 ng/g creatinine, TXB<sub>2</sub> 684 ng/g creatinine, PGE<sub>2</sub> 783 ng/g creatinine) as a function of b-Pb at the time of urine collection. \*\*\* $P < 0.001$ , \*\* $P < 0.01$ ,  $\chi^2$  test (Fisher's exact test) vs group with Pb < 100  $\mu\text{g/l}$ .

elevated (Table 4, Figure 2c). PGE<sub>2</sub> correlated with b-Pb ( $r = 0.23$ ,  $P < 0.05$ ). In children with b-Pb > 200  $\mu\text{g/l}$ , a significantly higher percentage of children exceeded the 95th percentile of the controls (Figure 3).

## Discussion

With the help of urinary biomarkers, the effects of chronic low level Pb exposure could be detected in children. Changes in glomerular and tubular markers (such as eicosanoids, transferrin, Clara cell protein and EGF) were observed. Children showed effects at very

**Fig. 2.** (a–c) Cumulative frequency of urinary eicosanoids in Pb-exposed and control children. The x-axis has been truncated; figures in the upper right corners denote extreme values that have been cut-off.

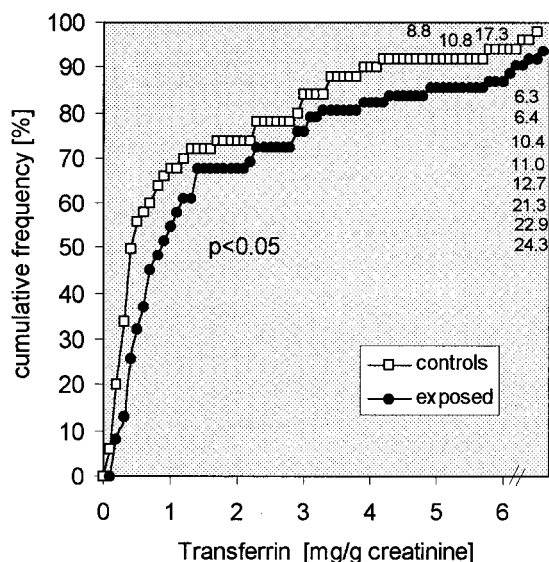

Fig. 4. Cumulative frequency of urinary transferrin in Pb-exposed and control children. The x-axis has been truncated; figures in the upper right corners denote extreme values that have been cut-off.

low levels of b-Pb. The effects were similar to those previously described for workers with a higher exposure to Pb [3,5]. The observations do not lead to immediate therapeutic interventions, and the relevance of the sub-clinical changes remains a subject of speculation. However, in terms of prevention that attempts to minimize or avoid even subtle effects on kidney function, children can be considered a special risk group, and the current lowest adverse effect level of 100  $\mu\text{g Pb/l}$  blood appears to be justified from a nephrological point of view.

#### Pb exposure

The exposed children had significant increases in their b-Pb over several years. They also had elevated u-Pb. Pb-induced changes of haemoglobin synthesis could not be observed. This is in accordance with studies showing a threshold for an elevation of zinc protoporphyrin in children at  $\sim 250 \mu\text{g Pb/l}$  blood [30].

b-Cd and u-Cd were modestly, but significantly elevated in the exposed children. b-Pb significantly correlated ( $P < 0.001$ ) with b-Cd ( $r = 0.309$ ), u-Cd ( $r = 0.561$ ) and u-Pb ( $r = 0.768$ ). Synergistic effects of Pb and Cd cannot be excluded.

#### Evaluation of kidney function with markers of effect in serum and urine

Creatinine in serum and total protein were not affected, indicating once more that these parameters—important in clinical routine—are not sensitive enough to reflect subtle changes in kidney function in environmental medicine.

**Eicosanoids as urinary markers.** As in previous studies on Pb-exposed adults, eicosanoids as urinary markers showed an altered excretion [3,5].  $\text{PGE}_2$ , 6-keto- $\text{PGF}_{1\alpha}$

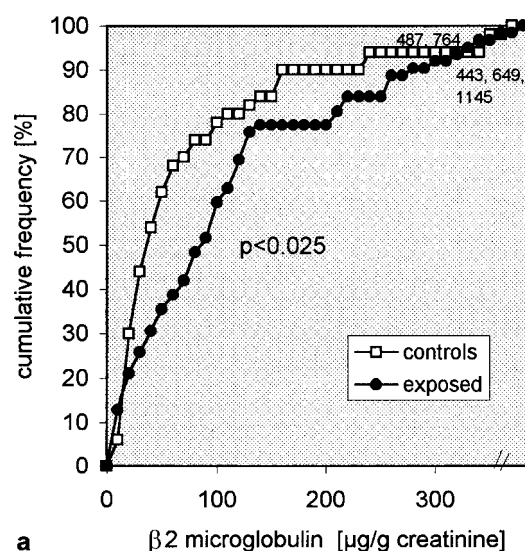

a  $\beta 2$  microglobulin [ $\mu\text{g/g creatinine}$ ]

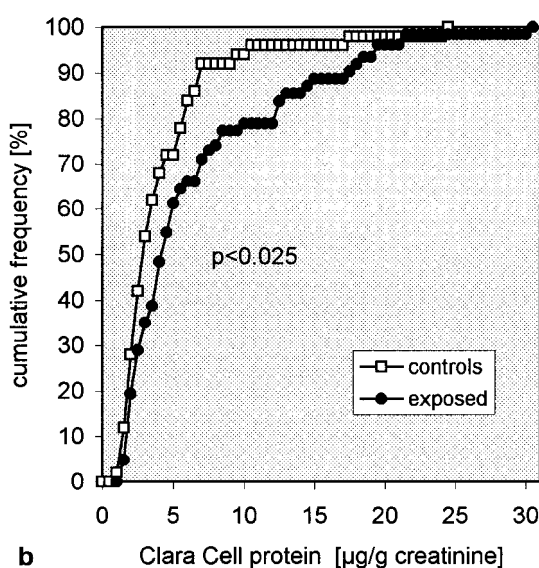

b

Fig. 5. (a and b) Cumulative frequency of urinary excretion of  $\beta_2$ -microglobulin and Clara cell protein in Pb-exposed and control children. The x-axis has been truncated; figures in the upper right corner denote extreme values that have been cut-off.

and  $\text{TXB}_2$ , the latter two being stable products of prostacyclin and  $\text{TXA}_2$ , were elevated.  $\text{LTE}_4$ , a lipoxygenase metabolite of arachidonic acid, however, was not affected. In the kidney, 6-keto- $\text{PGF}_{1\alpha}$  is synthesized mainly in glomeruli and  $\text{PGE}_2$  mainly in medullary collecting duct cells [31]. Excretion of 6-keto- $\text{PGF}_{1\alpha}$ ,  $\text{TXB}_2$  and  $\text{PGE}_2$  was 30–54% higher in the exposed children than in the controls. A higher prevalence of increased results as a function of b-Pb could also be observed (Figure 3).

Among the biological effects of eicosanoids are vasoconstriction and vasodilatation of afferent and efferent blood vessels, and contraction of smooth muscle cells and mesangial cells [32–34]. Due to their short half-life ( $\text{TXA}_2$ , for example, is metabolized



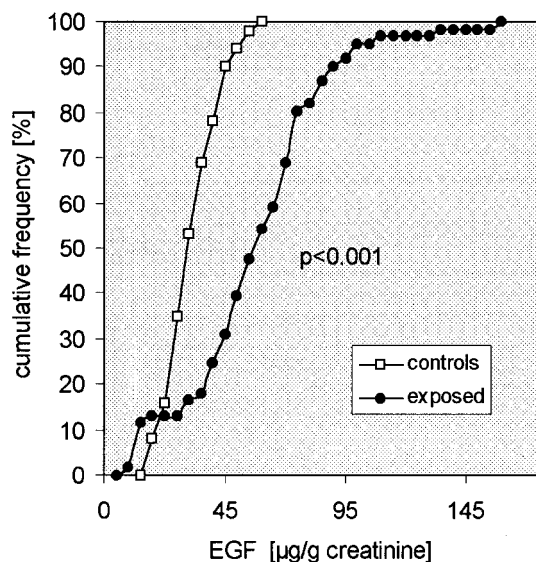

Fig. 6. Cumulative frequency of urinary EGF in Pb-exposed and control children.

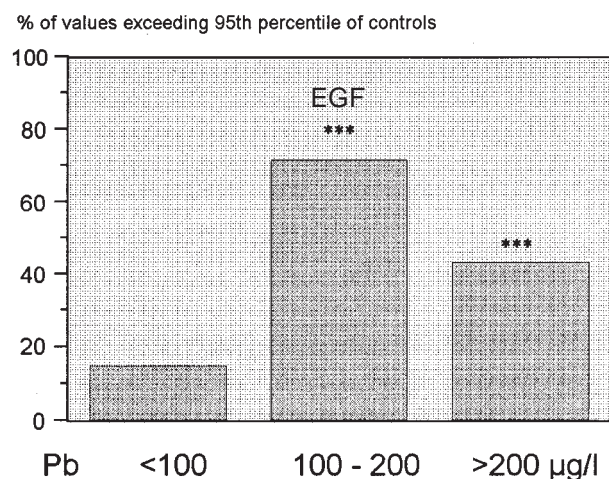

Fig. 7. Prevalence of values exceeding the upper limit of normal of EGF (95th percentile of the controls of 51 µg/g creatinine) as a function of b-Pb at the time of urine collection. \*\*\* $P < 0.001$ ,  $\chi^2$  test (Fisher's exact test) vs group with Pb < 100 µg/l.

within 30s [34]), eicosanoids can be considered to be active mainly at their site of secretion. Under physiological conditions, extra-renal TXB<sub>2</sub> seems to be excreted in urine in a modified form [34]. Under pathophysiological conditions, such as hypertension, higher urinary levels of TXB<sub>2</sub> were found in urine [35]. An association of Pb exposure and blood pressure has been discussed [36]. Among the children examined, there were no known cases of hypertension.

**Enzymes and renal antigens as markers of proximal tubular function.** Neither  $\alpha$ GST, AAP,  $\gamma$ GT, NAG<sub>total</sub> nor IAP as markers of proximal tubular function showed any difference between the two groups studied. A recently published study on Pb-exposed children in Romania showed that NAG<sub>total</sub> and AAP were affected

[37]. However, mean b-Pb in those children was 342 µg/l, almost three times higher than in the Polish children.

The isoform NAG B has been considered to be more specific for the proximal tubule; in kidney disease there is an exponential increase in NAG B as part of NAG<sub>total</sub> [38]. In workers, NAG B was elevated even following low cadmium exposure; no threshold for an increase could be defined [39]. In the Pb-exposed Polish children, NAG B was lower than in the controls (Table 4), but NAG B as a percentage of NAG<sub>total</sub> was about the same in both groups.

Monoclonal antibodies directed against antigens of the tubular brush border (CB7, CG9, HF5) have been proposed as markers of toxic damage to the kidney of children [40], but did not show alterations in this study. In experimental studies on rats exposed to high doses of Pb, these markers were elevated, together with GST and NAG [41].

**Proteins as markers of glomerular and proximal tubular function.**  $\beta_2$ -Microglobulin, Clara cell protein and  $\alpha_1$ -microglobulin in urine were either significantly elevated or showed a higher prevalence of values exceeding the upper reference limits of the controls (Table 4, Figure 5b and c).  $\beta_2$ -Microglobulin in serum was also elevated in the exposed children (Table 3). Possibly a selective induction of  $\beta_2$ -microglobulin synthesis could explain its increase in Pb-exposed children without any changes in glomerular filtration rate. In this case,  $\beta_2$ -microglobulin in urine would reflect synthetic activity rather than tubular function. In toxicological studies, Clara cell protein (synonym CC16 or protein 1) has been used mainly as a marker of damage to the respiratory tract. Secreted into the blood, Clara cell protein is handled by the kidney like other proteins of low molecular weight. Increases in urinary Clara cell protein concentrations and fractional excretion indicate an impairment of proximal tubular protein reabsorption. Clara cell protein has been considered a more sensitive marker of proximal tubular function than  $\beta_2$ - and  $\alpha_1$ -microglobulin and RBP in previous studies on cadmium-induced proteinuria and Chinese herb nephropathy [29].

The protein RBP and LMW as the total amount of proteins with a molecular weight less than that of albumin were not different between the two groups. That RBP was not affected is at variance with a study in Czech children [12] but in accordance with the aforementioned study in Romanian children [37].

The proteins fibronectin and laminin are structural

Table 3. Indicators of kidney function determined in serum

| Parameter                       | Controls<br>(n = 50) | Exposed<br>(n = 62) |
|---------------------------------|----------------------|---------------------|
| Creatinine (mg/dl)              | 0.63 ± 0.10          | 0.63 ± 0.09         |
| $\beta_2$ -Microglobulin (mg/l) | 1.66 ± 0.80          | 2.18 ± 0.89**       |
| Clara cell protein (µg/l)       | 11 (2–107)           | 11 (5–23)           |

\*\* $P < 0.01$ , *t*-test.

proteins that can be of renal origin. In Pb-exposed adults, fibronectin excretion was shown to be reduced [5]. No such effect could be observed in the children. *Markers of distal tubular function.* EGF was excreted by the exposed children in significantly higher amounts than by the controls. EGF expression is most pronounced in the distal tubule [42]. Receptors for EGF have been identified in the glomeruli and along the tubules [42,43]. A variety of effects have been attributed to EGF: changes in glomerular haemodynamics, and alteration of water permeability and sodium reabsorption of the distal nephron and cortical collecting duct [42]. EGF induces the synthesis of eicosanoids [44]. Therefore, altered excretion of eicosanoids could be a secondary effect of an elevated EGF release. Previous studies showed decreased excretion rates of EGF following acute kidney failure or kidney transplantation, probably due to ischaemia or drugs, and higher excretion rates in the adaptive phase following uninephrectomy [45,46].  $\pi$ GST is expressed in the distal tubule [47] and was elevated during acute rejections of transplanted kidneys, whereas the isoform  $\alpha$ GST of the proximal tubule was not affected [48].

In the children, about the same pattern of markers (6-keto-PGF<sub>1 $\alpha$</sub> , TXB<sub>2</sub>, PGE<sub>2</sub>, transferrin,  $\alpha_1$ - and  $\beta_2$ -microglobulin, Clara cell protein, EGF) was affected as previously reported for Pb-exposed adults [3–5]. However, the exposed adults had mean Pb levels of 420 or 480  $\mu$ g/l, their corresponding controls had 70 or 167  $\mu$ g/l. The exposed children described here had a mean b-Pb of 133  $\mu$ g/l, their controls 39  $\mu$ g/l. Higher body burdens of Pb in the so-called unexposed adults can be considered a consequence of a longer duration of Pb accumulation. When the unexposed adults described by Pergande *et al.* [4] and Fels *et al.* [5] were divided into two subgroups, one with low b-Pb one with high b-Pb, no changes in urinary markers comparable with those observed in the children were found.

We conclude that early urinary markers can help to detect subtle alterations in kidney integrity in children. Chronic exposure is followed by changes in all nephron segments. The pattern of changes observed is similar to that of adults, but seems to occur at lower exposure levels. Children, therefore, appear to be a particularly vulnerable risk group, and the threshold of 100  $\mu$ g Pb/l blood can be considered to be justified not only from a neurological but also from a nephrological point of view.

*Acknowledgements.* The authors would like to thank the staff of the Paediatric Clinic Zabrze and of the local schools, and particularly the children for their support and help. The study was supported by the Commission of the European Communities (contract EV5V-CT94-0408). L.M.F. was supported by the 'Gesellschaft der Freunde der Medizinischen Hochschule Hannover'. The gift of test kits for  $\pi$ GST and  $\alpha$ GST by Biotrin, Ireland is acknowledged.

## References

1. EPA (Environmental Protection Agency). Evaluation of the potential carcinogenicity of lead and lead compounds. EPA-600/8-89/045A. 1989; US EPA, Washington, DC
2. Houk VN. Implications of newer data for screening and evaluation of children. In: Needleman HL, ed. *Low Level Lead Exposure: The Clinical Implications of Current Research*. Raven Press, New York: 1980: 231–237
3. Cardenas A, Roels H, Bernard AM *et al.* Markers of renal changes induced by industrial pollutants. II. Applications to workers exposed to lead. *Br Med J* 1993; 50: 17–27
4. Pergande M, Jung K, Precht S, Fels LM, Herbort C, Stolte H. Changed excretion of urinary proteins and enzymes by chronic exposure to lead. *Nephrol Dial Transplant* 1994; 9: 613–618
5. Fels LM, Herbort C, Pergande M *et al.* Nephron target sites in chronic exposure to lead. *Nephrol Dial Transplant* 1994; 9: 1740–1746
6. Krause C, Babisch W, Becker K *et al.* *Umwelt-Survey 1990/92. Band Ia: Studienbeschreibung und Human-Biomonitoring-Deskription der Spurenelementgehalte in Blut und Urin der Bevölkerung in der Bundesrepublik Deutschland.* Institut für Wasser-, Boden- und Lufthygiene des Umweltbundesamtes (Institute for Water, Soil and Air of the Federal Environmental Agency, Berlin, Germany), WaBoLu-Heft 1, 1996
7. Mushak P, Davis JM, Crocetti AF, Grant LD. Review. Prenatal and postnatal effects of low-level lead exposure: integrated summary of a report to the U.S. Congress on childhood lead poisoning. *Environ Res* 1989; 50:11–36
8. Winneke G, Brockhaus A, Ewers U, Krämer U, Neuf M. Results from the European multi-center study on lead neurotoxicity in children: implications for risk assessment. *Neurotoxicol Teratol* 1990; 12: 553–559
9. Centers for Disease Control and Prevention. *Preventing Lead Poisoning in Young Children*. US Department of Health and Human Services, Atlanta, GA: 1991
10. Goyer RA. Toxic effects of metals. In: Amdur MO, Doull J, Kaassen CD, eds *Toxicology*. 4th edn. Pergamon Press, New York: 1993: 623–680
11. Schwartz J, Landrigan PJ, Baker EL, Orenstein WA, Von Lindern IH. Lead-induced anemia: dose response relationships and evidence for a threshold. *Am J Public Health* 1990; 80: 165–168
12. Bernard AM, Vyskocil A, Roels H, Kriz J, Kodl M, Lauwerys R. Renal effects in children living in the vicinity of a lead smelter. *Environ Res* 1995; 68: 91–95
13. Kommission 'Human-Biomonitoring' des Umweltbundesamtes. Stoffmonographie Blei-Referenz- und Biomonitoring-Werte (HBM). *Bundesgesundhbl* 1996; 6: 236–241
14. Bradford MM. A rapid and sensitive method for the quantification of microgram quantities of protein utilizing the principle of protein-dye binding. *Anal Biochem* 1976; 72: 248–254
15. Laemmli UK. Cleavage of structural proteins in the assembly of the head of bacteriophage T4. *Nature* 1970; 227: 680–685
16. Bernard A, Lauwerys R. Continuous flow system for automation of latex immunoassay by particle counting. *Clin Chem* 1983; 29: 1007–1011
17. Mutti A, Lucertini S, Valcavi P *et al.* Urinary excretion of brush-border antigen revealed by monoclonal antibody: early indicator of toxic nephropathy. *Lancet* 1985; 2: 914–917
18. Verpooten GF, Nuyts GD, Hoylarts MF *et al.* Immunoassay in urine of a specific marker for proximal tubular S3 segment *Clin Chem* 1992; 38: 642–647
19. Nouwen EJ, Verstreppe WA, De Broe ME. Epidermal growth factor in acute renal failure. *Renal Failure* 1994; 16: 49–60
20. Engval E. Fibronectin. In: Bergmeyer HV, ed. *Methods of Enzymatic Analysis*. Verlag Chemie, Weinheim, Germany: 1986: 201
21. Price RG, Taylor SA, Crutcher E, Bergamaschi E, Franchini I, Mackie AD. The assay of laminin fragments in serum and urine as an indicator of renal damage induced by toxins. *Toxicol Lett* 1995; 77: 313–318
22. Gelpi E, Ramis I, Hotter G, Bioque G, Bulbena O, Roselló J. Modern high-performance liquid chromatographic-radioimmunoassay strategies for the study of eicosanoids. *J Chromatogr* 1989; 492: 223–250
23. Kristz W, Samaan GJ, Leberre C, Demelier JF, Biou D. Semi automated fluorometric assay for urinary total and B N-acetyl-



- beta-D-glucosaminidase: analytical investigation. *J Clin Lab* 1991; 5: 1–2
24. Tucker SM, Boyd PJR, Thompson AE, Price RG. Automated assay of *N*-acetyl- $\beta$ -D-glucosaminidase in normal and pathological human urine. *Clin Chim Acta* 1975; 62: 333–339
  25. Mattenheimer H, Frölke W, Grötsch H, Maruhn D, Simane Z. Recommendation for the measurement of 'alanine aminopeptidase' in urine. *J Clin Chem Clin Biochem* 1988; 26: 635–644
  26. Wahlefeld AW, Bermeyer HU.  $\gamma$ -Glutamyltransferase. Routine method. In: Bermeyer HU, Bergmeyer J, Grassi M, eds *Methods of Enzymatic Analysis*. Verlag Chemie, Weinheim, Germany: 1994; Vol. 3: 352–356
  27. Merck, Klinisches Laboratorium, 12th edition E. Merck, Darmstadt, Germany: 1974: 473–478
  28. Davey PG, Gosling P.  $\beta_2$ -Microglobulin instability in pathological urine. *Clin Chem* 1982; 28: 1330–1333
  29. Bernard A, Lauwerys R. Low-molecular weight proteins as markers of organ toxicity with special reference to Clara cell protein. *Toxicol Lett* 1995; 77: 145–151
  30. Roels H, Lauwerys R. Evaluation of dose–effect and dose–response relationships for lead exposure in different Belgian population groups (fetus, child, adult men and women). *Trace Elements Med* 1987; 4: 80–87
  31. Bonvalet JP, Pradelles P, Farman N. Segmental synthesis and actions of prostaglandins along the nephron. *Am J Physiol* 1987; 253: F377–F387
  32. Klahr S. Role of arachidonic acid metabolites in acute renal failure and sepsis. *Nephrol Dial Transplant* 1994; 9 [Suppl 4]: 52–56
  33. Patrono C, Dunn MJ. The clinical significance of inhibition of renal prostaglandin synthesis. *Kidney Int* 1987; 32: 1–12
  34. Remuzzi G, Fitzgerald GA, Patrono C. Thromboxane synthesis and action within the kidney. *Kidney Int* 1992; 41: 1483–1493
  35. Stoff JS. Prostaglandins and hypertension. *Am J Med* 1986; 80 [Suppl 1A]: 56–61
  36. Victory W. Evidence for effects of chronic lead exposure on blood pressure in experimental animals: an overview. *Environ Health Perspect* 1988; 78: 71–76
  37. Verberk MM, Willems TE, Verplanke AJ, De Wolff FA. Environmental lead and renal effects in children. *Arch Environ Health* 1996; 51: 83–87
  38. Simane ZJ. Lysosomal enzymes. In: Jung K, Mattenheimer H, Buchardt U, eds *Urinary Enzymes in Clinical and Experimental Medicine*. Springer Verlag, Berlin/Heidelberg: 1992: 118–124
  39. Bernard A, Thielemans N, Roels H, Lauwerys R. Association between NAG B and cadmium in urine with no evidence of a threshold. *Occup Environ Med* 1995; 52: 177–180
  40. Ginevri F, Mutti A, De Toni T, Ghiggeri GM, Perfumo F, Gusmano R. Normal levels of urinary brush-border antigens and other tubular markers in children. *Pediatr Nephrol* 1993; 7: 240–241
  41. Khalil-Manesh F, Gonick HC, Cohen AH *et al.* Experimental model of lead nephropathy. I. Continuous high-dose lead administration. *Kidney Int* 1992; 41: 1192–1203
  42. Verstrepen WA, Nouwen EJ, De Broe ME. Renal epidermal growth factor and insulin-like growth factor I in acute renal failure. *Nephrol Dial Transplant* 1994; 9 [Suppl 5]: 57–68
  43. Kim DC, Hanano M, Kanai Y, Ohnuma N, Sugiyama Y. Localization of binding sites for epidermal growth factor (EGF) in rat kidney: evidence for the existence of low affinity EGF binding sites on the brush border membrane. *Pharmacol Res* 1992; 9: 1394–1401
  44. Burns KD, Capdevila J, Wei S, Breyer MD, Homma T, Harris RC. Role of cytochrome P-450 epoxigenase metabolites in EGF signaling in renal proximal tubule. *Am J Physiol* 1995; 269: C831–C840
  45. Taira T, Yoshimura A, Iizuka K, Iwasaki S, Ideura T, Koshikawa S. Urinary epidermal growth factor levels in patients with acute renal failure. *Am J Kidney Dis* 1993; 22: 656–661
  46. Jorgensen PE, Kamper AL, Munck O, Strandgaard S, Nexø E. Urinary excretion of epidermal growth factor in living human kidney donors and their recipients. *Eur J Clin Invest* 1995; 25: 442–446
  47. Sundberg AGM, Nilsson R, Appelkvist E, Dallner G. Immunohistochemical localisation of alpha and pi class glutathione transferases in normal human tissues. *Pharmacol Toxicol* 1993; 72: 321–331
  48. Sundberg AGM, Appelkvist E, Backman L, Dallner G. Urinary  $\pi$ -class glutathione transferase as an indicator of tubular damage in the human kidney. *Nephron* 1994; 67: 308–316

Received for publication: 23.1.98

Accepted in revised form: 8.4.98
